# Supplementary material for: O auto-conceito de competência na transição do secundário para a universidade
Source: Hindawi journal article supplement (doi:10.1155/2017/5804147), 2002-01-01

*Y. Ikeda, et. al.,*

## **Supplemental Information**

*Supplemental Figure1 : The leniviral-mediated gene intduction of IGF-1 into the human Syn-MSC*

A: showing mRNA transcript levels by RT-PCR using human IGF-1 specific primer pairs.

The control (left) vs. IGF-1 gene transferred cell (right).

B: Protein expression by Western blotting with anti-IGF1 antibody (ab9572, Abcam, Cambridge, UK).

The control (left) vs. IGF-1 gene transferred cell (right).

C: Cell surface marker expression of Control and IGF-1 transferred cells by fluorescence-activated cell sorting (FACS) analysis.

*Supplemental Figure2 : The results of histology assessments from the other cases*

The control (left) vs. IGF-1 gene transferred cell derived pellets (right).

T-B; Toluidine-Blue (upper lane), S-O; Safranin-O (lower lane)

Left: Scale bars =500 $\mu$ m, right: Scale bars =200  $\mu$ m

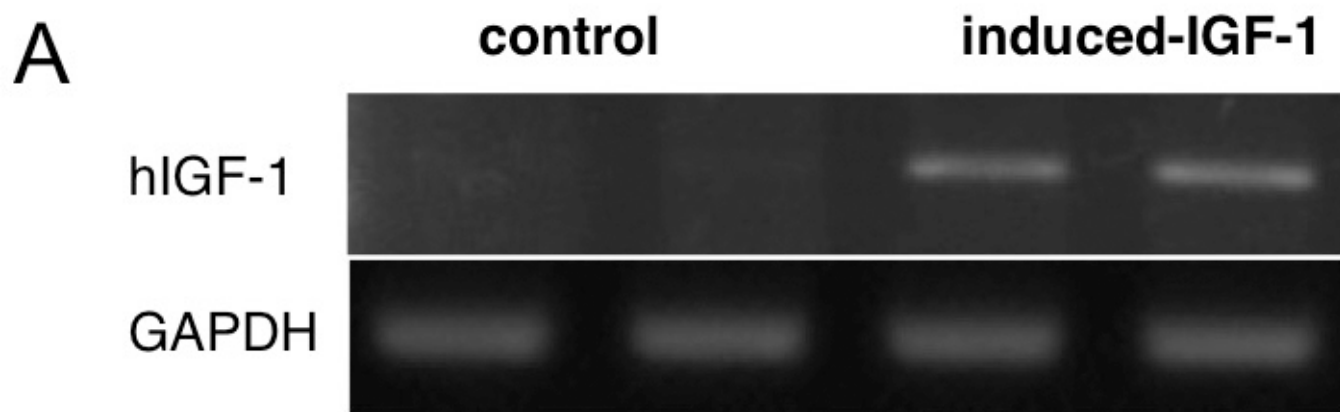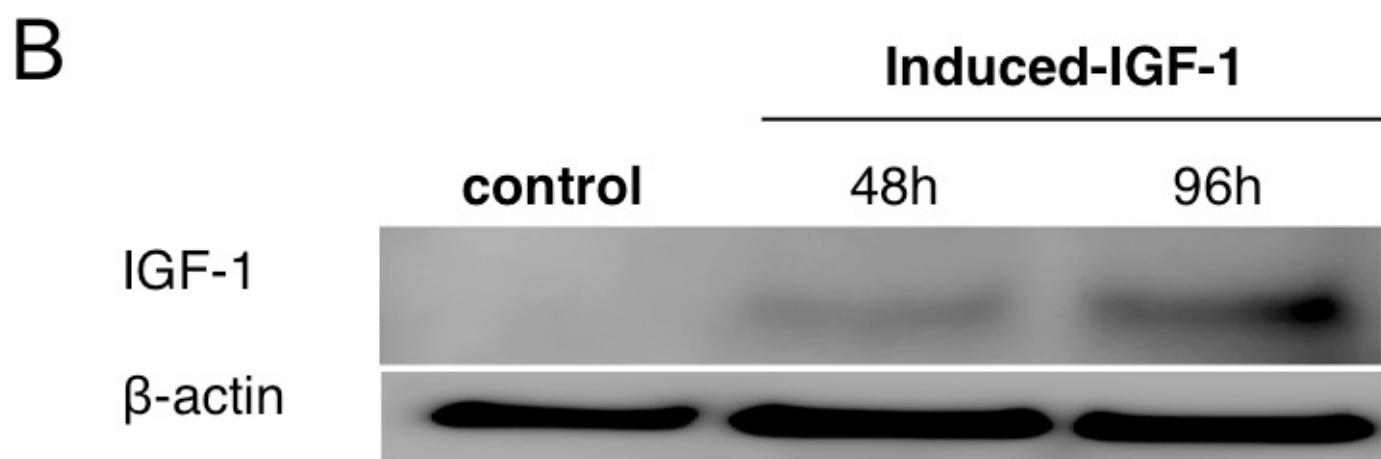

C

control

induced-IGF-1

CD44

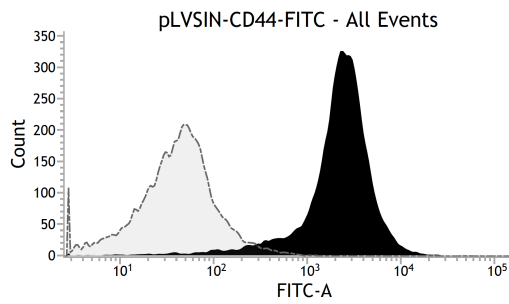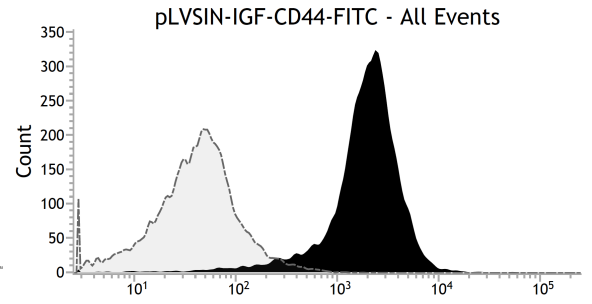

CD73

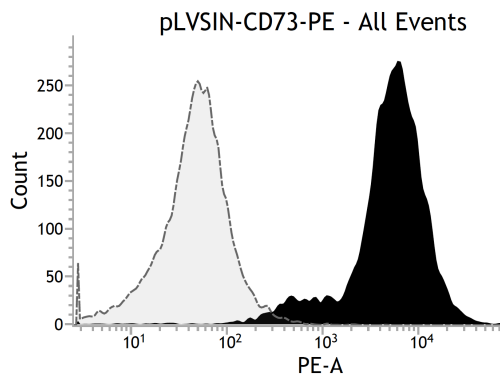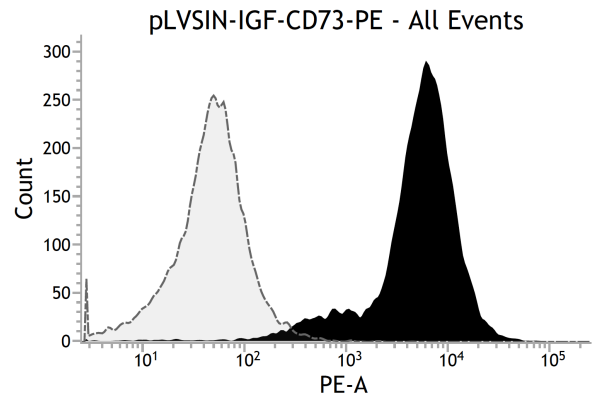

CD90

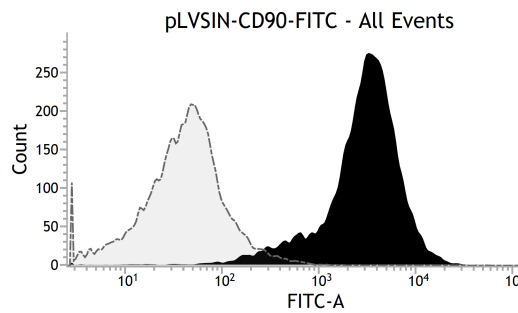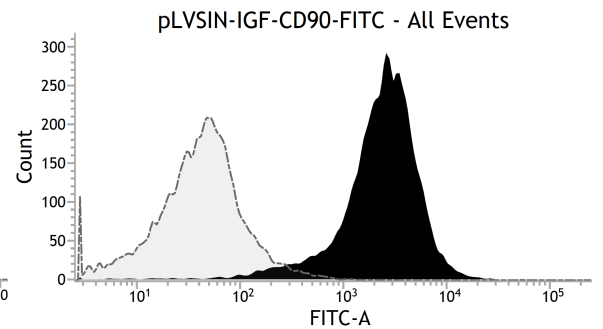

CD105

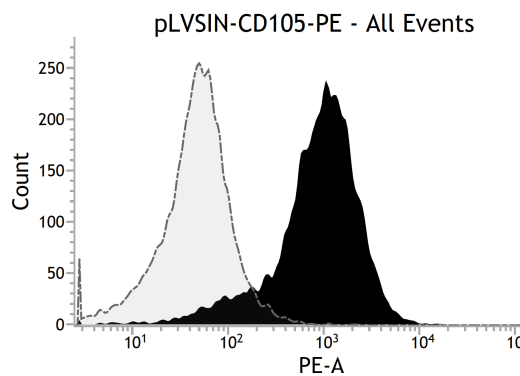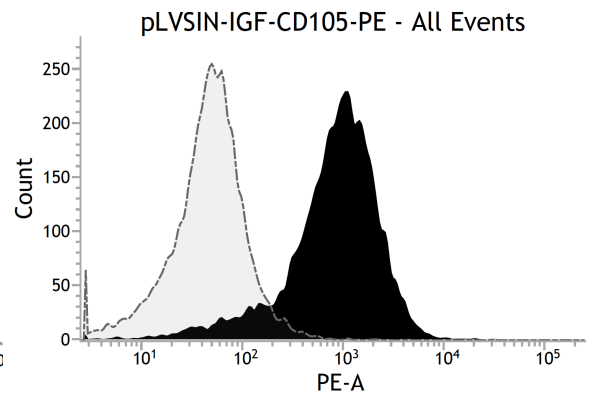

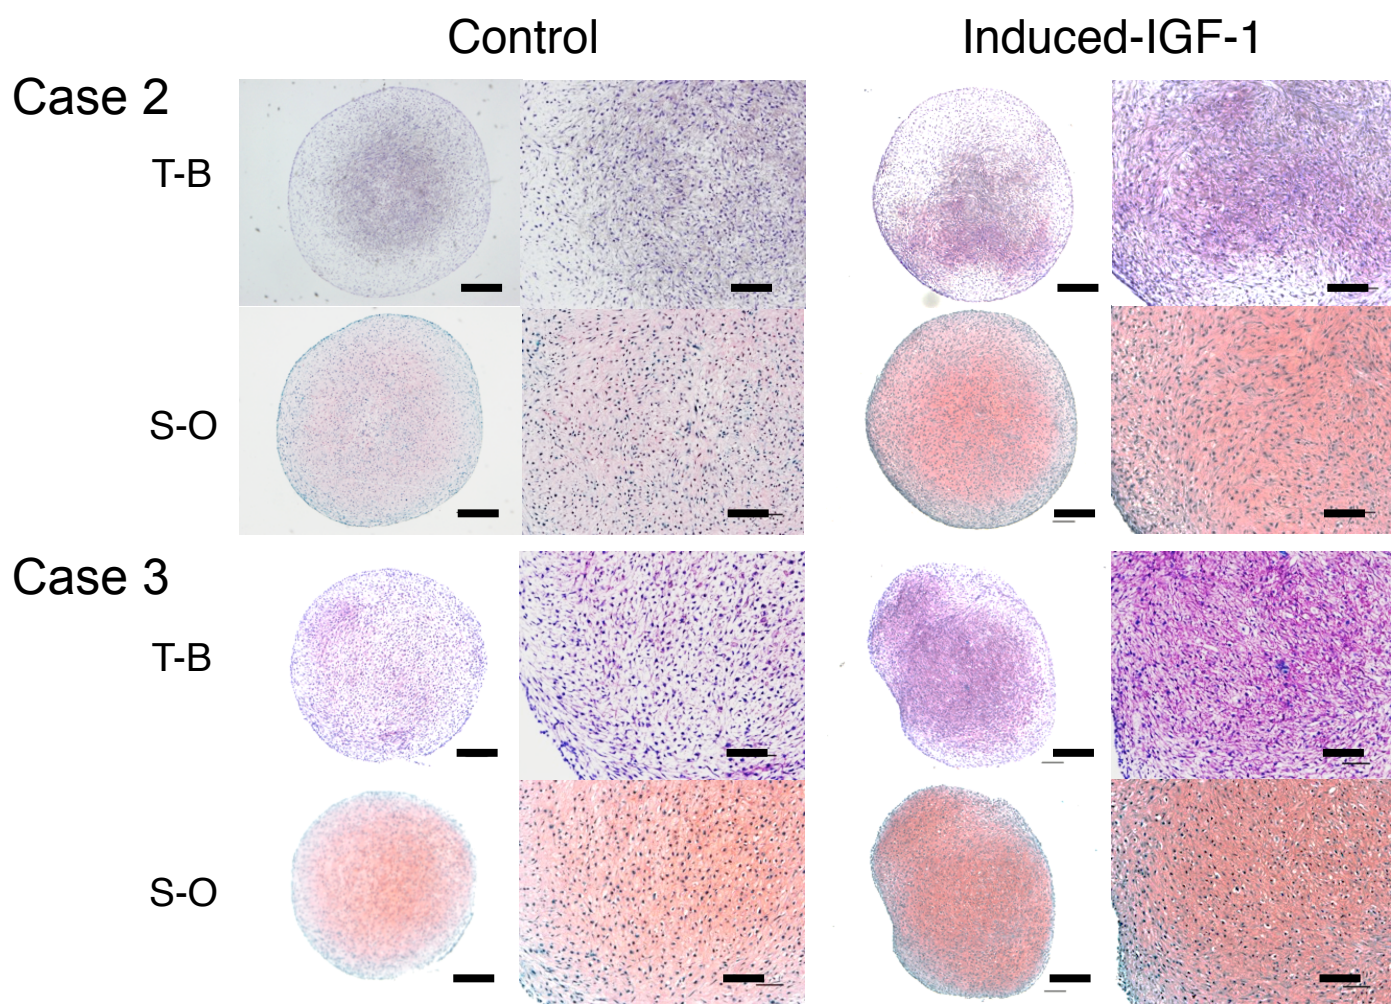

Supplement: f1 [file 5804147.f1.pdf]
